# Supplementary material for: Diagnostic Utility of Genetic and Immunohistochemical H3-3A Mutation Analysis in Giant Cell Tumour of Bone
Source: MDPI journal article supplement (doi:10.3390/ijms23020969), 2022-01-16
Supplement: s1 [file s1]

**Table S1:** Decalcification procedure

| Steps:              | Description:                                                                                                                                                                                                                                                                                                                                                                                                                                                                                                                                                                                                                                                                                                                                                                                                                                                                                                                                                                                                                                                                                                                                                                                                                                                                                                                                                                             |
|---------------------|------------------------------------------------------------------------------------------------------------------------------------------------------------------------------------------------------------------------------------------------------------------------------------------------------------------------------------------------------------------------------------------------------------------------------------------------------------------------------------------------------------------------------------------------------------------------------------------------------------------------------------------------------------------------------------------------------------------------------------------------------------------------------------------------------------------------------------------------------------------------------------------------------------------------------------------------------------------------------------------------------------------------------------------------------------------------------------------------------------------------------------------------------------------------------------------------------------------------------------------------------------------------------------------------------------------------------------------------------------------------------------------|
| 1. Tissue sampling: | <p>-whole material processed in the case of core needle biopsies, open biopsies and curettage</p> <p>-representative sections no more than 3 mm in thickness and fitting loosely in tissue cassettes cut from post-operative materials</p> <p><u>At least one cassette containing soft tissue/small bone chips from sent materials should be collected separately and processed without decalcification, if possible.</u></p>                                                                                                                                                                                                                                                                                                                                                                                                                                                                                                                                                                                                                                                                                                                                                                                                                                                                                                                                                            |
| 2. Fixation:        | <p>tissue should be fixed in 10% neutral buffered formalin (pH 7.2–7.4)—usually 12h, maximally 24h at room temperature before decalcification.</p>                                                                                                                                                                                                                                                                                                                                                                                                                                                                                                                                                                                                                                                                                                                                                                                                                                                                                                                                                                                                                                                                                                                                                                                                                                       |
| 3. Decalcification: | <p>1. in tissue cassettes in <u>10% buffered ethylenediaminetetraacetate solution (EDTA)</u>, heated to 36–37 °C on hotplate Stirrers [220 RPM can be used but is not necessary] or in an incubator</p> <p>EDTA solution:</p> <p>A. commercially available: Mol-DECALCIFER, Milestone</p> <p>or</p> <p>B. self-manufactured:</p> <ul style="list-style-type: none"> <li>- 50 g EDTA disodium dihydrate</li> <li>- distilled water 400 mL</li> <li>- app. 3 ml 5M NaOH</li> </ul> <p>mix well and adjust pH to 7.4 with NaOH</p> <p>add water to 500 mL</p> <p>2. The material/decalcifying agent ratio should be at least 1:20, but ratio 1:40 is recommended</p> <p>3. EDTA solution changed at least every two days</p> <p>4. tissue decalcification state checked every day manually. Tissue samples removed from EDTA solution gradually, once soft enough to be processed</p> <p>5. hard to decalcify materials: move to 4,5–5% formic acid solution [e.g. Thermo Scientific™ Shandon™ TBD-2™ Decalcifier diluted 5 times in distilled water] heated to 36–37°C</p> <p><u>This material is not suitable for FISH analysis and direct sequencing analysis is significantly compromised. Use only when appropriate material without decalcification and/or from EDTA solution was previously obtained</u></p> <p>6. overall decalcification time usually complete within 2-7days.</p> |
| 4. Processing:      | <p>Wash 1-2 hours in running tap water. Process using standard protocols for H&amp;E staining with extension of paraffin embedding process to 24-48 hours.</p>                                                                                                                                                                                                                                                                                                                                                                                                                                                                                                                                                                                                                                                                                                                                                                                                                                                                                                                                                                                                                                                                                                                                                                                                                           |

**Table S2: FISH analysis**

| Steps:                     | Description:                                                                                                                                                                                                                                                                                                                                                                                                                                                                                                                                                                                                                                                                                                                                                                                                     |
|----------------------------|------------------------------------------------------------------------------------------------------------------------------------------------------------------------------------------------------------------------------------------------------------------------------------------------------------------------------------------------------------------------------------------------------------------------------------------------------------------------------------------------------------------------------------------------------------------------------------------------------------------------------------------------------------------------------------------------------------------------------------------------------------------------------------------------------------------|
| 1. Materials:              | <ul style="list-style-type: none"> <li>-not decalcified or EDTA-decalcified only</li> <li>-4 µm thick sections cut from FFPE blocks on two adhesive glass slides (one for FISH analysis and one H&amp;E staining)</li> <li>-slides dried at 56 °C for 1 hour</li> <li>-H&amp;E evaluated by the pathologist—at least 100 neoplastic cells required</li> </ul>                                                                                                                                                                                                                                                                                                                                                                                                                                                    |
| 2. FISH probes:            | <ul style="list-style-type: none"> <li>-FISH USP6 break-apart probe (Cytotest), to detect USP6 gene (17p13.2) rearrangement</li> <li>-FISH MDM2/CCP12 probe (Cytotest) to assess amplification of the <i>MDM2</i> gene (12q15)</li> </ul>                                                                                                                                                                                                                                                                                                                                                                                                                                                                                                                                                                        |
| 3. Pre-processing:         | <ul style="list-style-type: none"> <li>-automatic in the Abbott VP2000 tissue processor using PathVysion KIT II (Abbott) according to the following protocol:</li> <li>1. deparaffinization of slides (xylene 3 x, 10 min each)</li> <li>2. dehydration (ethanol 2 x, 5 min each)</li> <li>3. drying (45 °C, 5 min)</li> <li>4. 0.2N HCl (20 min)</li> <li>5. demineralized water (3 min)</li> <li>6. wash buffer: 2 x SSC (saline-sodium citrate)—5 min each</li> <li>7. pretreatment [1] (30 min, 80 °C)</li> <li>8. demineralized water (1 min)</li> <li>9. enzymatic digestion (proteinase K, 37 °C, 90 min)</li> <li>10. wash buffer [2 x SSC (2 x 5 min)]</li> <li>11. ethanol 70% (1 min)</li> <li>12. ethanol 80% (1 min)</li> <li>13. ethanol 96% (1 min)</li> <li>14. drying (3 min, 45 °C)</li> </ul> |
| 4. Hybridization:          | <ul style="list-style-type: none"> <li>-10 µl of each probe/slide covered with coverslips</li> <li>-according to the protocol:</li> <li>1. denaturation 5 min at 75 °C</li> <li>2. overnight hybridization at 37 °C</li> <li>[first two steps automatic in the ThermoBrite machine (Abbott)]</li> <li>3. rinsing with the post-hybridization wash solution (2 x SSC/0.3% NP-40) at RT to remove coverslips</li> <li>4. rinsing with pre-warmed post-hybridization wash solution (2 x SSC /0.3% NP-40) in a water bath at 72 ± 1 °C for 2 minutes</li> <li>5. drying in the dark</li> <li>6. applying 10 µl contrast dye DAPI in a vertical position</li> <li>7. kept covered and in dark until analyzed</li> </ul>                                                                                               |
| 5. Microscopic evaluation: | <ul style="list-style-type: none"> <li>-Olympus BX41 fluorescence microscope</li> <li>-under 1000 x magnification with immersion</li> <li>-filters for FISH USP6 probe: DAPI, spectrum orange/red filter—red signal form 3'USP6; spectrum green/green filter—green signal form the 5'USP6</li> <li>-filters for FISH MDM2 probe: DAPI, spectrum orange/red filter—MDM2 gene; spectrum green/green filter—centromere 12</li> <li>-100 (for USP6) or 60 (for MDM2) nuclei</li> </ul>                                                                                                                                                                                                                                                                                                                               |
| 6. Result interpretation:  | <ul style="list-style-type: none"> <li>--FISH USP6: positive if at least 20% of cells with rearrangement</li> <li>-FISH MDM2: MDM2/CEP12 ratio at least 2.0—abnormal (positive).</li> </ul>                                                                                                                                                                                                                                                                                                                                                                                                                                                                                                                                                                                                                      |

**Table S3: Molecular analysis**

| Steps:                                   | Description:                                                                                                                                                                                                                                                                                                                                                                                                                                                                                                                                                                                                                                                                                                                                                                                                                                                                                                                                                                                                                                                                                                          |
|------------------------------------------|-----------------------------------------------------------------------------------------------------------------------------------------------------------------------------------------------------------------------------------------------------------------------------------------------------------------------------------------------------------------------------------------------------------------------------------------------------------------------------------------------------------------------------------------------------------------------------------------------------------------------------------------------------------------------------------------------------------------------------------------------------------------------------------------------------------------------------------------------------------------------------------------------------------------------------------------------------------------------------------------------------------------------------------------------------------------------------------------------------------------------|
| Materials:                               | <p>Tissue materials fixed in formalin and embedded in paraffin blocks were used. Ethylenediaminetetraacetic acid (EDTA) was used for decalcification.</p> <p>Materials in which the neoplastic tissue constituted at least 50% of the tissue in the paraffin block were qualified for the study, exclusively.</p> <p>Paraffin blocks were cut on a microtome into paraffin sections with a thickness of 5–10 µm and deparaffinized.</p>                                                                                                                                                                                                                                                                                                                                                                                                                                                                                                                                                                                                                                                                               |
| Deparaffinisation:                       | <p>Briefly 800 µl of xylene was added to 23 paraffin sections 5–10 µm thick, placed in a 1.5 mL Eppendorf tube, mixed on vortex, and incubated 10 minutes at 60 °C. It was mixed again and then centrifuged 2 min 20,000 x g. The supernatant was removed from the tube. The first stage was repeated without incubation and subsequently, 800 µL of 99.8% ethanol was added. After mixing and centrifuging (2 min. 20,000 x g), ethanol was removed. The procedure was repeated twice and the pellets were dried under vacuum (5 min).</p>                                                                                                                                                                                                                                                                                                                                                                                                                                                                                                                                                                           |
| DNA isolation:                           | <p>DNA was isolated using QiaAmp DNA Mini Kit (Qiagen) for not decalcified tissue and for EDTA-decalcified ones. In the case of tissues decalcified in strong acids (outward biopsies) or after denosumab treatment, Sherlock AX (A&amp;A Biotechnology) was applied.</p>                                                                                                                                                                                                                                                                                                                                                                                                                                                                                                                                                                                                                                                                                                                                                                                                                                             |
| DNA quantity measurement:                | <p>DNA quantity was measured on Quantus Fluorometer (Promega) using QuantiFluor DNA System (Promega) according to producer's protocol.</p>                                                                                                                                                                                                                                                                                                                                                                                                                                                                                                                                                                                                                                                                                                                                                                                                                                                                                                                                                                            |
| PCR amplification and Sanger sequencing: | <p>DNA fragments were amplified by PCR using self-designed primers in Primer3 software (<a href="https://primer3.ut.ee/">https://primer3.ut.ee/</a>). The regions where primers anneal were selected not to contain any variants with MAF &gt;0,01% according to Ensembl (<a href="http://www.ensembl.org">www.ensembl.org</a>). The final length of products did not exceed 200 bp.</p> <p><i>H3-3A</i> (exon 2, analysis of codons 35 and 37):<br/> <i>H3-3A_F</i> 5'- CATGGCTCGTACAAAGCAGA -3'<br/> <i>H3-3A_R</i> 5'- CAAGAGAGACTTTGTCCCATTTTT -3'</p> <p><i>H3-3B</i> (exon 2, analysis of codon 37)<br/> <i>H3-3B_F</i> 5'- GCCCGAACCAAGCAGACT -3'<br/> <i>H3-3B_R</i> 5'- CCGACCTACCTGTAGCGATG -3'</p> <p><i>GNAS</i> (exon 8, analysis of codon 201)<br/> <i>GNAS_8_F</i> 5'- CCTKTGCTTTAGATTGGCAATTATTA -3'<br/> <i>GNAS_8_R</i> 5'- ACTTTGTCCACCTGGAACCTG -3'</p> <p><i>GNAS</i> (exon 9, analysis of codon 227)<br/> <i>GNAS_9_F</i> 5'- CACCCAGTCCCTCTGGA -3'<br/> <i>GNAS_9_R</i> 5'- CGACCCTGATCCCTAACAAAC -3'</p> <p>The PCR sample was prepared in the total volume of 25 µL (TaqGold® polymerase</p> |

|                         |                                                                                                                                                                                                                                                                                                                                                                                                                                                                                                                                                                                                        |
|-------------------------|--------------------------------------------------------------------------------------------------------------------------------------------------------------------------------------------------------------------------------------------------------------------------------------------------------------------------------------------------------------------------------------------------------------------------------------------------------------------------------------------------------------------------------------------------------------------------------------------------------|
|                         | <p>0,03 U/μL ; buffer 1 x ; dNTP 200 μM , MgCl<sub>2</sub> 2 mM, primers 200 nM each, DNA template 50–100 ng and water up to 25μL). The PCR protocol was as follows: initial denaturation 95 °C, 5 min; 40x (denaturation 95 °C, 30s ; annealing 57 °C, 30s, elongation 72 °C, 30s); final extension 72 °C, 7 min and held in 4 °C.</p> <p>The Sanger sequencing was performed on ABI Prism 3130 xl Genetic Analyzer (Applied Biosystems) using standard protocol.</p>                                                                                                                                 |
| Results interpretation: | <p>Results were interpreted by analysing the fluorogram in Chromas (<a href="http://www.technelysium.com">www.technelysium.com</a>) or FinchTV (<a href="http://www.geospiza.com">www.geospiza.com</a>) and Mutation Surveyor® DNA Variant Analysis Software (SoftGenetics) using reference sequences: <i>H3-3A</i> gene: NM_002107.4, <i>H3-3B</i> gene: NM_005324, <i>GNAS</i> gene: NM_000516.4.</p> <p>If in the given codon a double peak constituting at least 10% of the dominant peak (normal allele) was present , such a result was considered as positive (the presence of a mutation).</p> |

**Table S4:** Intensity of IHC staining assessed separately by two pathologists using Allred scoring templates

|                             |      | Intensity: pathologist II |          |           |            | All:       | p-value  |
|-----------------------------|------|---------------------------|----------|-----------|------------|------------|----------|
|                             |      | 0                         | 1+       | 2+        | 3+         |            |          |
| Intensity:<br>pathologist I | 0    | 61 (43.6%)                | 0        | 0         | 0          | 61 (43.6%) | <0.00001 |
|                             | 1+   | 0                         | 1 (0.7%) | 1 (0.7%)  | 1 (0.7%)   | 3 (2.1%)   |          |
|                             | 2+   | 0                         | 0        | 12 (8.6%) | 16 (11.4%) | 28 (20.0%) |          |
|                             | 3+   | 0                         | 0        | 0         | 48 (34.3%) | 48 (34.3%) |          |
|                             | All: | 61 (43.6%)                | 1 (0.7%) | 13 (9.3%) | 65 (46.4%) | 140 (100%) |          |

**Table S5:** Simplified concordance analysis for intensity and percentage of positive tumoral cells using best estimated cut-off value (zero based on ROC analysis) for both parameters

|                |      | pathologist I |            | All:         | p-value  |
|----------------|------|---------------|------------|--------------|----------|
|                |      | 0             | >0         |              |          |
| pathologist II | 0    | 61 (43.6%)    | 0 (0%)     | 61 (43.6%)   | <0,00001 |
|                | >0   | 0 (0%)        | 79 (56,4%) | 79 (56.4%)   |          |
|                | All: | 61 (43.6%)    | 79 (56.4%) | 140 (100.0%) |          |
